# Supplementary material for: A magnetic hierarchical zero-valent iron nanoflake-decorated graphene nanoplate composite for simultaneous adsorption and reductive degradation of rhodamine B
Source: Royal Society of Chemistry journal article supplement (doi:10.1039/d0nj00126k), 2020-01-01
Supplement: d0nj00126k1.pdf [file d0nj00126k1.pdf]

Supporting Information

**Facile synthesis of magnetic zero-valent iron nanoflake-decorated graphene nanoplates as synergistic adsorbent and reductant for effective rhodamine B degradation**

Trung-Dung Dang<sup>a,\*</sup> Hang T. T. Le<sup>a</sup> , Duy Anh Nguyen<sup>b</sup>, Duong Duc La<sup>b,\*</sup> Dinh Duc Nguyen<sup>c,d,\*</sup>

<sup>a</sup> School of Chemical Engineering, Hanoi University of Science and Technology, 1st Dai Co Viet, Hanoi, Vietnam

<sup>b</sup> Institute of Chemistry & Materials, 17 Hoang Sam, Cau Giay, Hanoi, Vietnam

<sup>c</sup> Institute of Research and Development, Duy Tan University, Da Nang, Vietnam

<sup>d</sup> Department of Environmental Energy Engineering, Kyonggi University, Republic of Korea

This provides further information about the magnetic properties of the GNPs@ZVI composite.

This material is available free of charge via the internet.

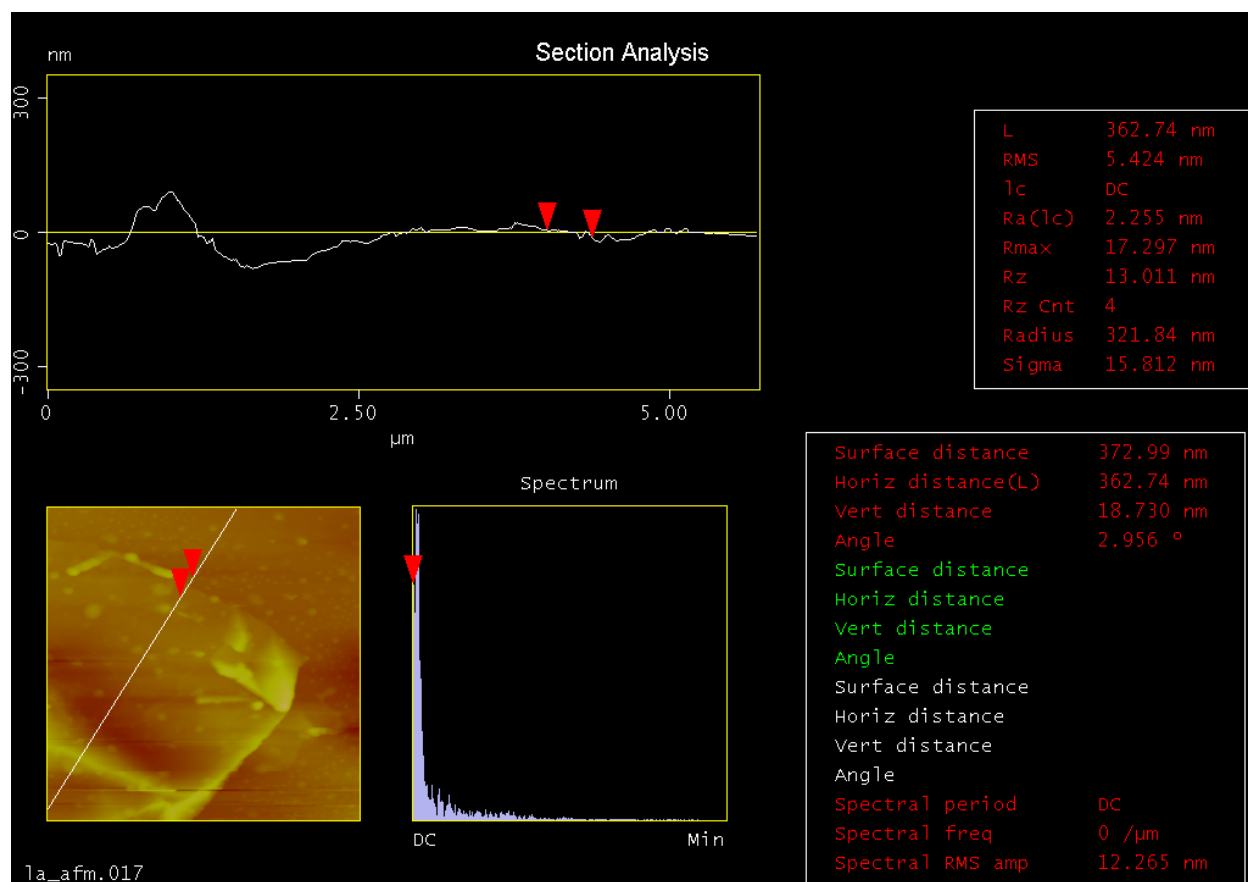

**Figure S1.** AFM images of graphene nanoplates

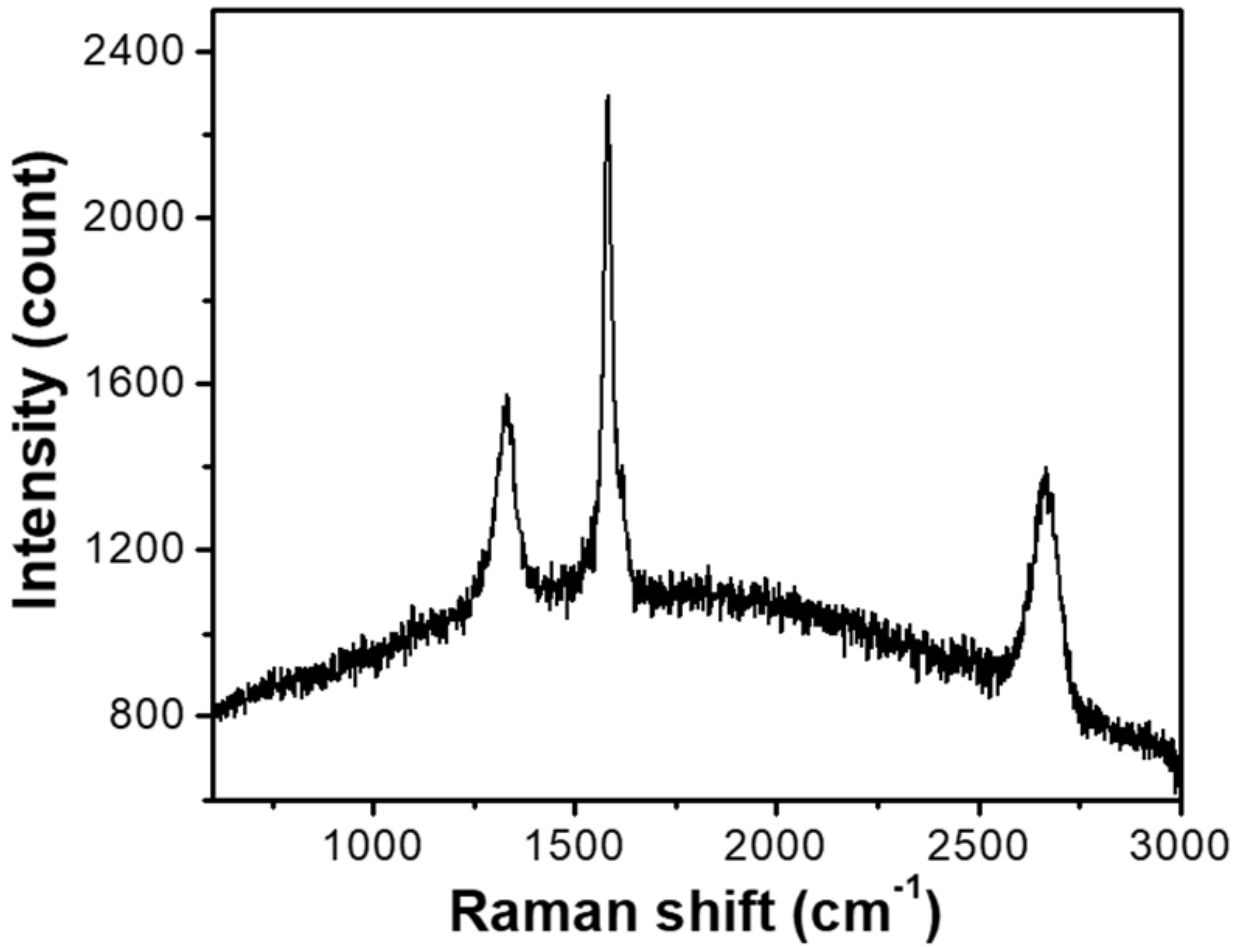

**Figure S2.** Raman spectrum of graphene nanoplates

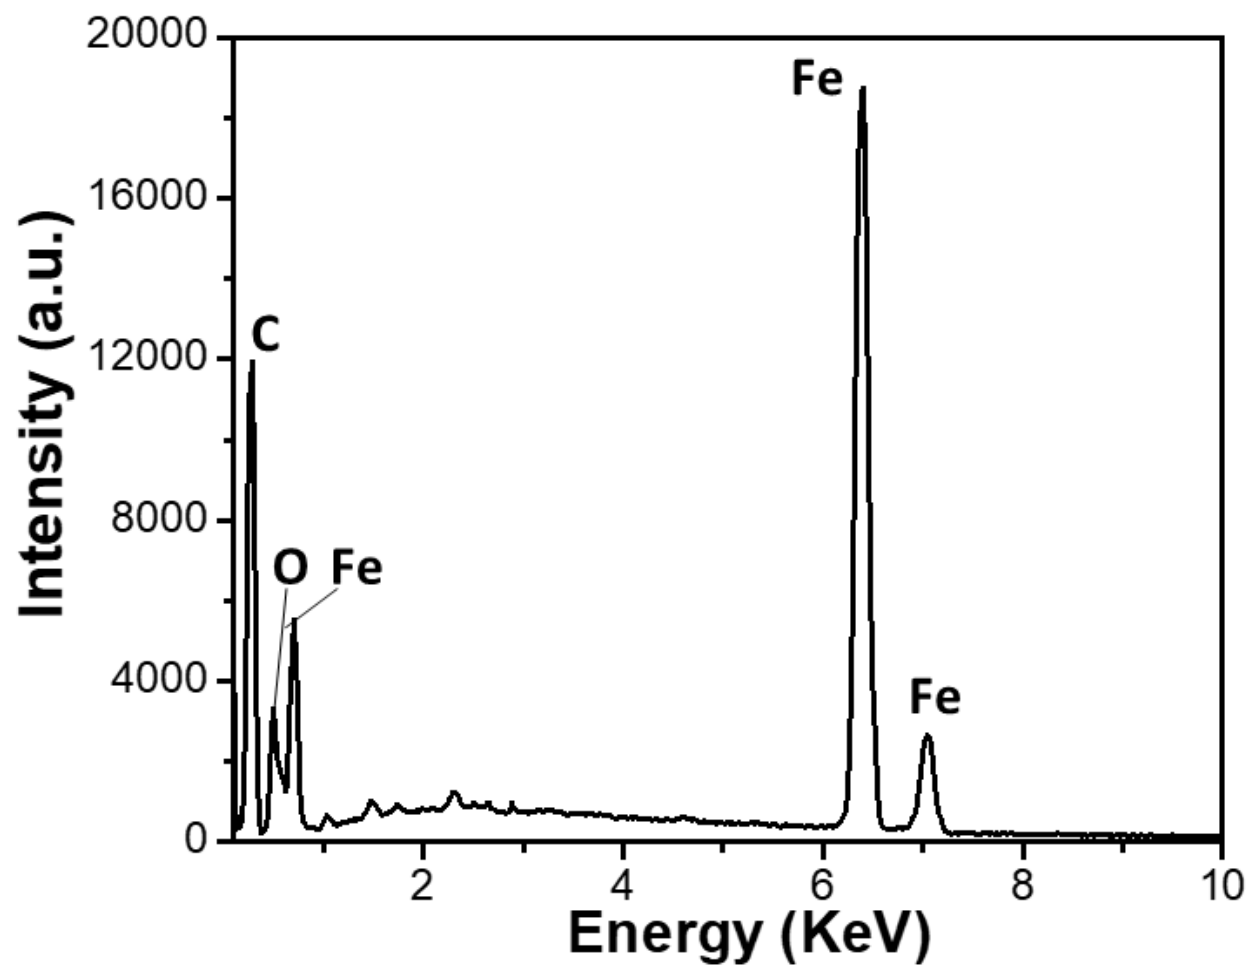

**Figure S3.** EDX spectrum of graphene@ZVI nanoflakes composite

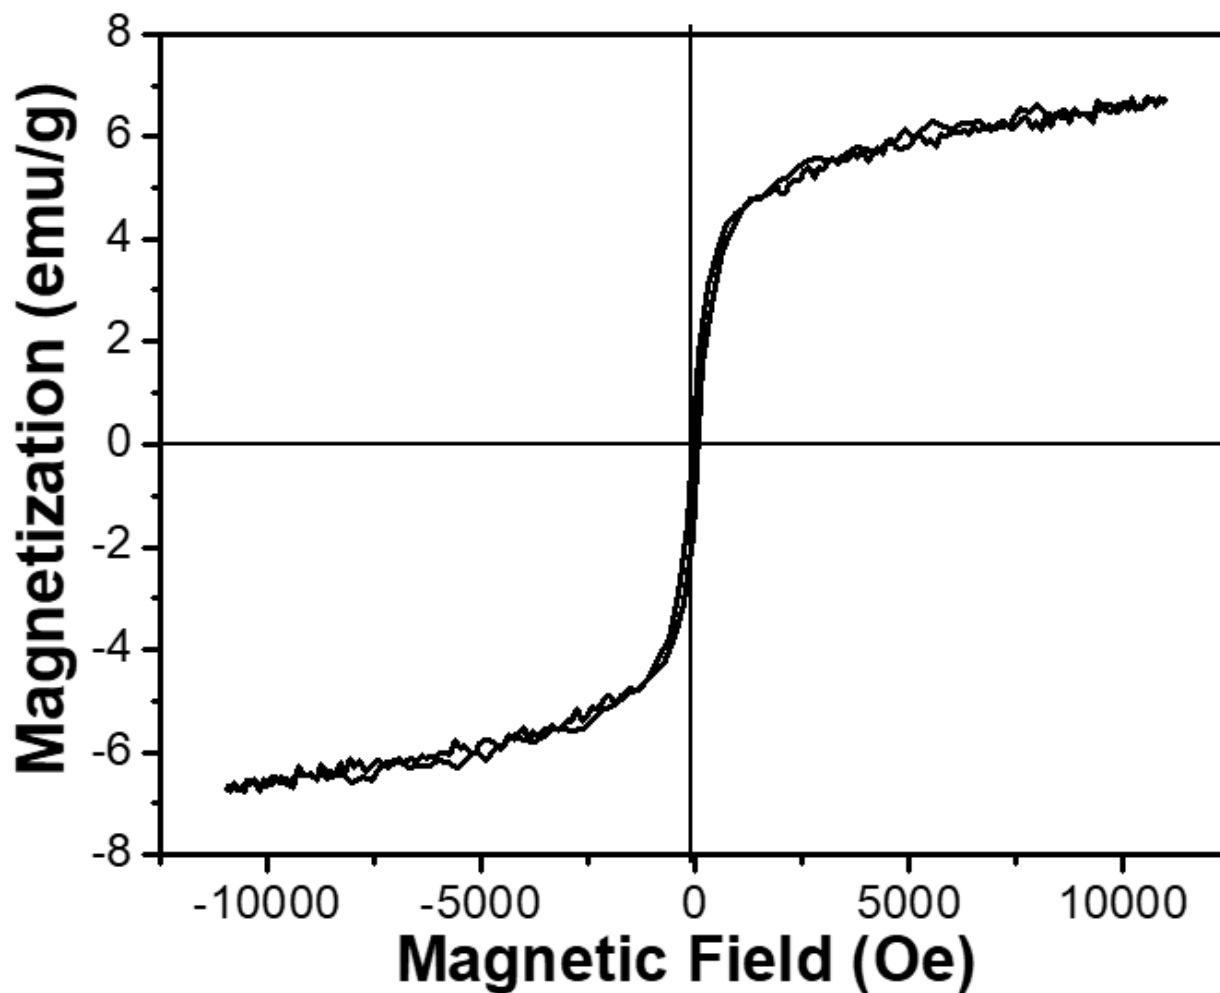

**Figure S4.** The magnetic properties of the ZVI nanoflakes-decorated graphene nanoplates composite.

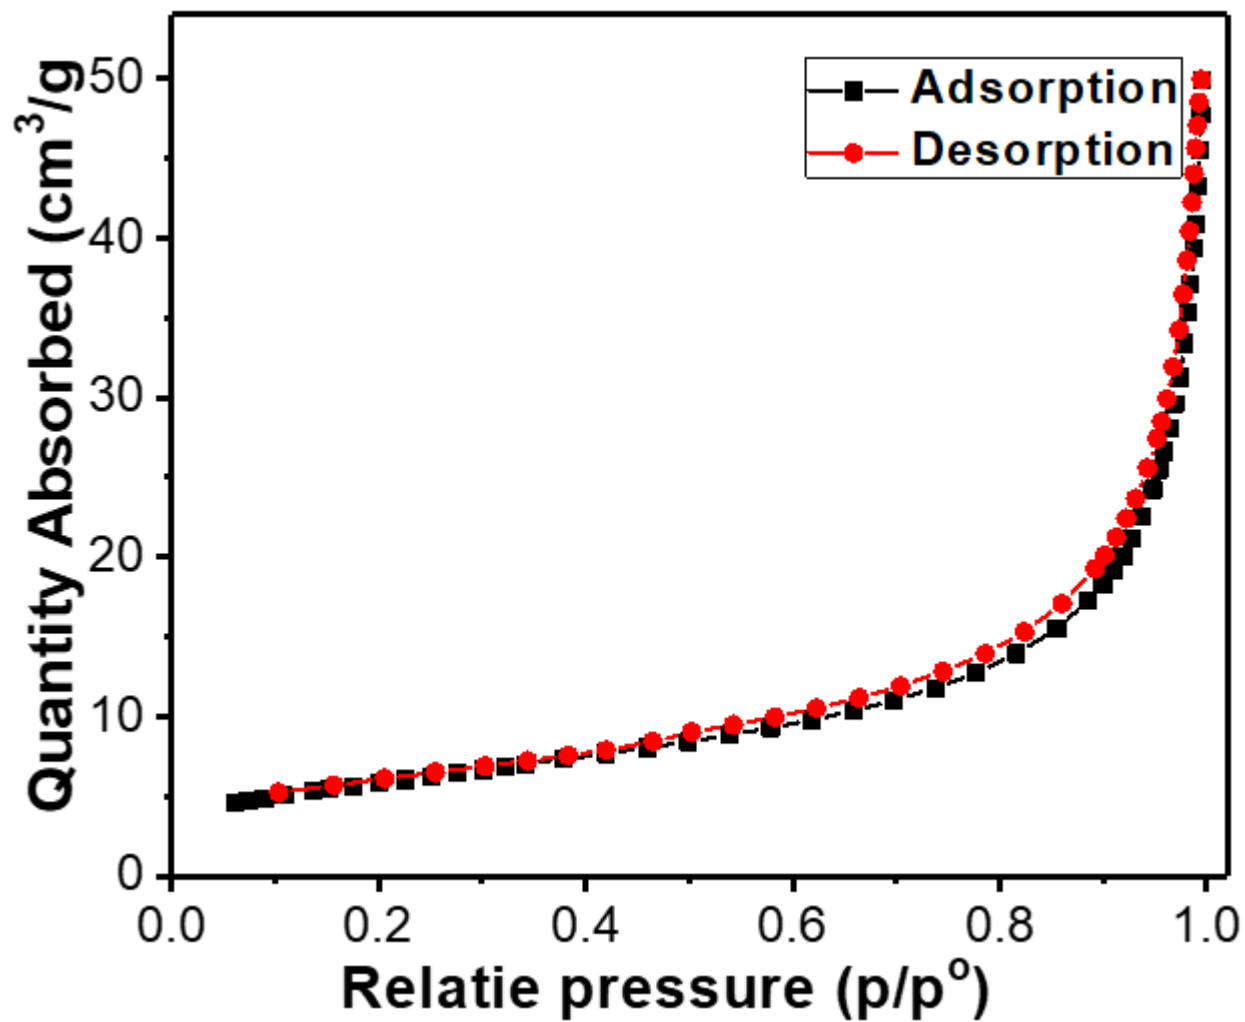

Figure S5. The N<sub>2</sub> adsorption and desorption curves of GNPs@fZVI nanocomposite.

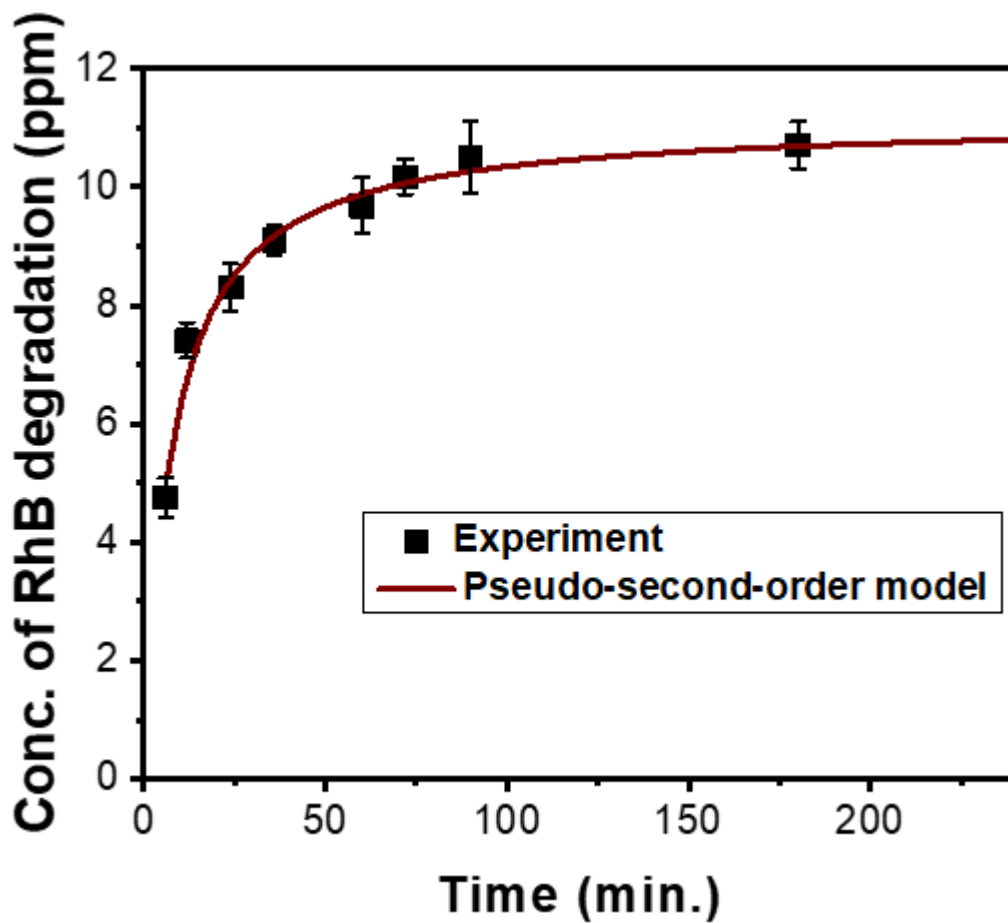

Figure S6. Kinetics model of simultaneous RhB degradation by GNPs@fZVI composite

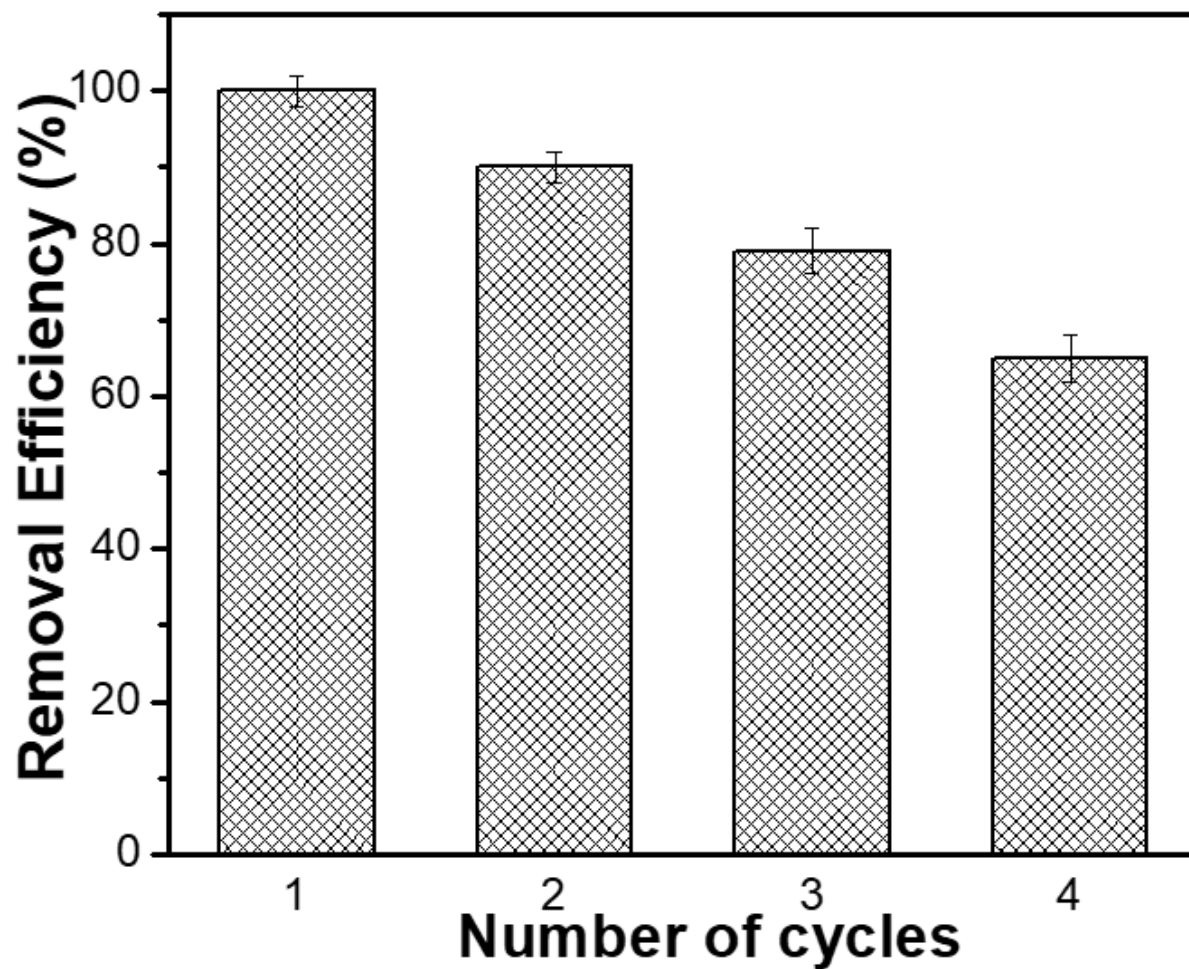

**Figure S7.** Recyclability of GNPs@fZVI composite for RhB removal



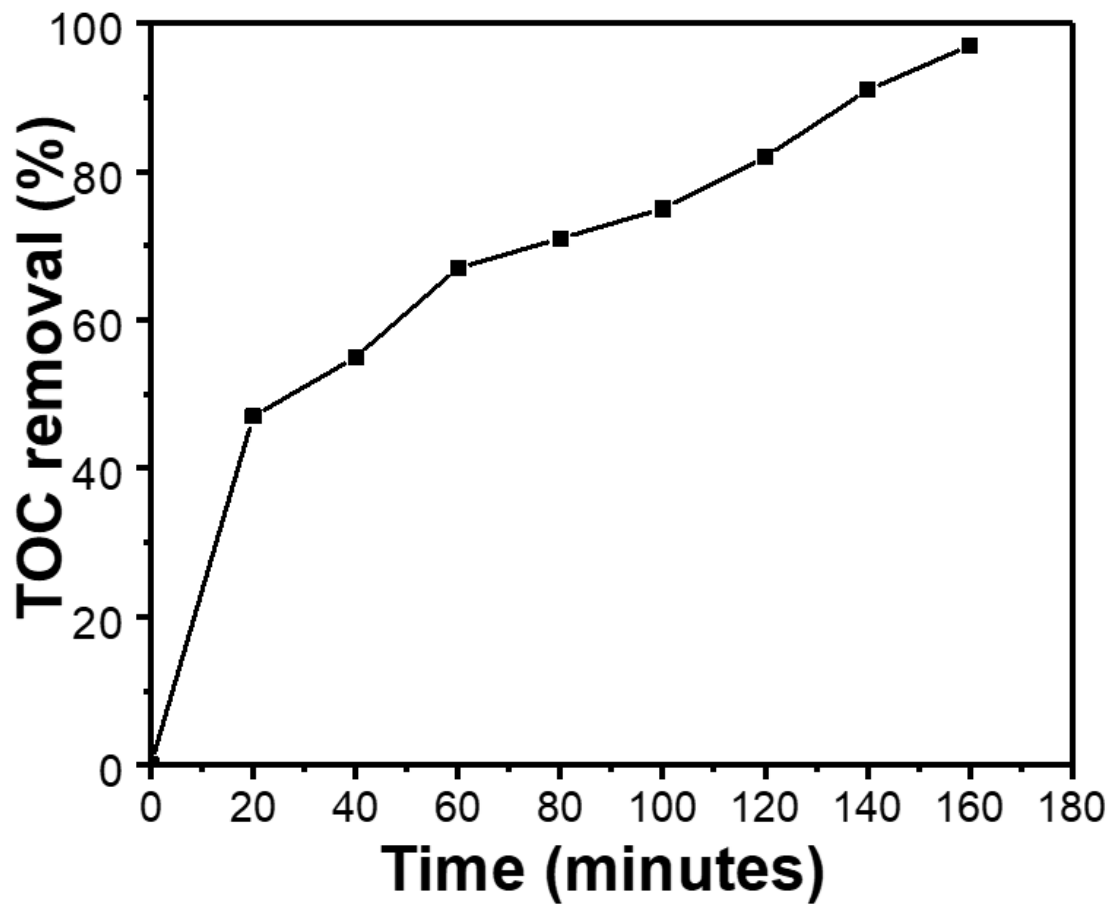

**Figure S8.** Total organic carbon (TOC) removal during the degradation of RhB in the presence of GNPs@fZVI composite
